# Supplementary material
Source: PubMed Central journal article supplement (PMC4854689)
Supplement: supp_pp.15.01886_PP2015-01886R1_Supplemental_Material.pdf [file supp_pp.15.01886_PP2015-01886R1_Supplemental_Material.pdf]

# Supplemental Fig. 1

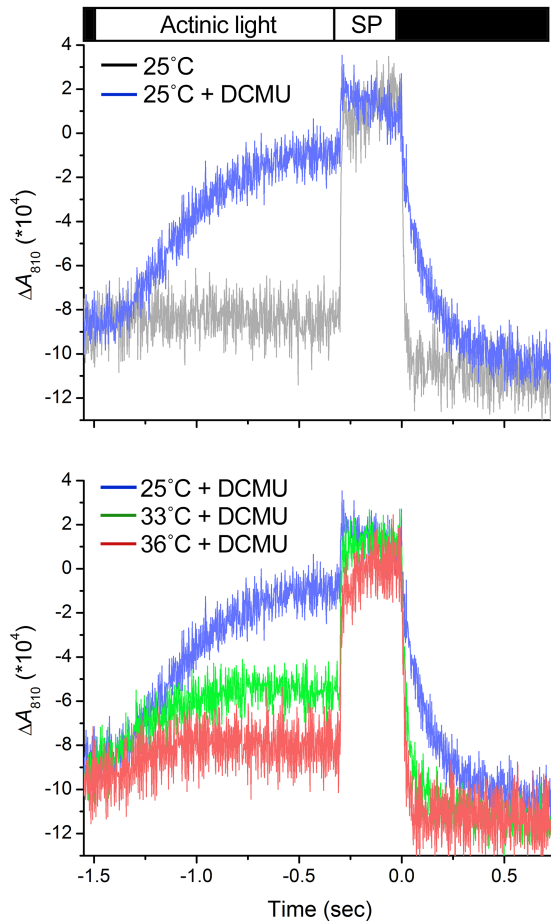

**Supplemental Figure. 1. Kinetics of P700 oxidation/reduction in *Symbiodinium* OTcH-1 during light exposure.** *Symbiodinium* cells were exposed to actinic light ( $240 \mu\text{mol m}^{-2} \text{s}^{-1}$ ) for 1,200 ms followed by saturating white-light (SP;  $2,000 \mu\text{mol m}^{-2} \text{s}^{-1}$ ) for 300 ms. Re-reduction of P700<sup>+</sup> in the dark after SP (black bar) was analyzed. The upper and lower panels illustrate the original kinetics for Figs. 1A and B, respectively.

## Supplemental Fig. 2

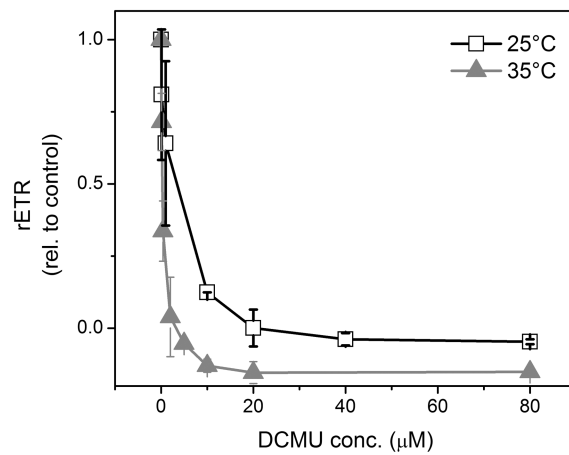

**Supplemental Fig. 2. Effect of DCMU on electron transfer in PSII in *Symbiodinium* OTcH-1.** Before measurements, the cells were incubated at 25°C or 35°C for 5 min in the dark, followed by the incubation in the presence of 0.1 – 80 μM DCMU at the same temperature for 10 min. rETR was determined after the cells were exposed to light at an intensity of 100 μmol photons m<sup>-2</sup> s<sup>-1</sup> for 1 min. The rETR values in the absence of DCMU (0 μM) at 25°C or 35°C were 37.2 ± 3 or 14.6 ± 3, respectively. The values are presented as the means ± the SDs from two independent experiments.

## Supplemental Fig. 3

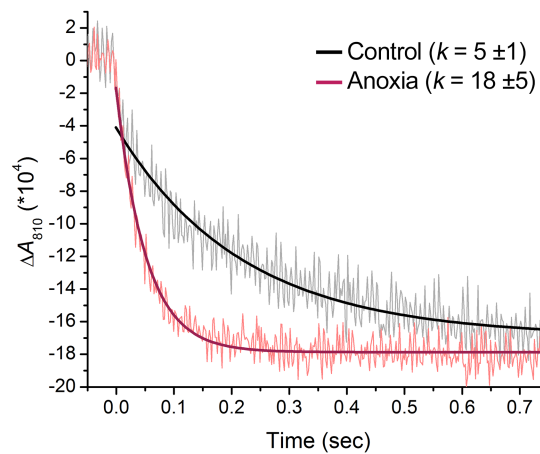

**Supplemental Figure. 3. Effects of anoxia on the rate of P700<sup>+</sup> reduction in *Symbiodinium* OTcH-1 in the presence of DCMU at 25°C.** Anoxic conditions were induced by the addition of glucose oxidase (1 mg/ml), glucose (10 mM) and catalase (200 units/ml) to the sample medium. The data were obtained as shown in Fig. 1. The reduction rate constants shown ( $k$ ) are the means  $\pm$  the SDs from three independent experiments.

# Supplemental Fig. 4

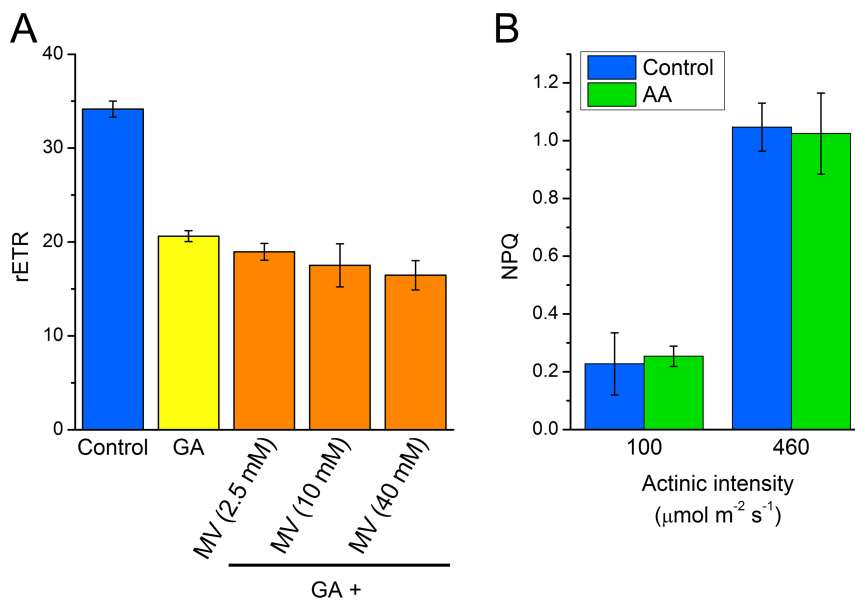

**Supplemental Figure. 4. Methylviologen (MV) and antimycin A (AA) were not effective in *Symbiodinium* OTcH-1.** A, Relative electron transfer rates (rETRs) in the presence and absence of 120 mM glycolaldehyde (GA) or 2.5 – 40 mM MV. rETR was determined after the cells were exposed to light at an intensity of  $60 \mu\text{mol m}^{-2} \text{s}^{-1}$  for 3 min at  $25^\circ\text{C}$ . B, Non-photochemical quenching (NPQ) in the presence or absence of  $100 \mu\text{M}$  AA. NPQ was measured after the cells were exposed to light at an intensity of 100 or  $460 \mu\text{mol m}^{-2} \text{s}^{-1}$  for 5 min at  $25^\circ\text{C}$ . The values are presented as the means  $\pm$  the SDs of three independent experiments.

# Supplemental Fig. 5

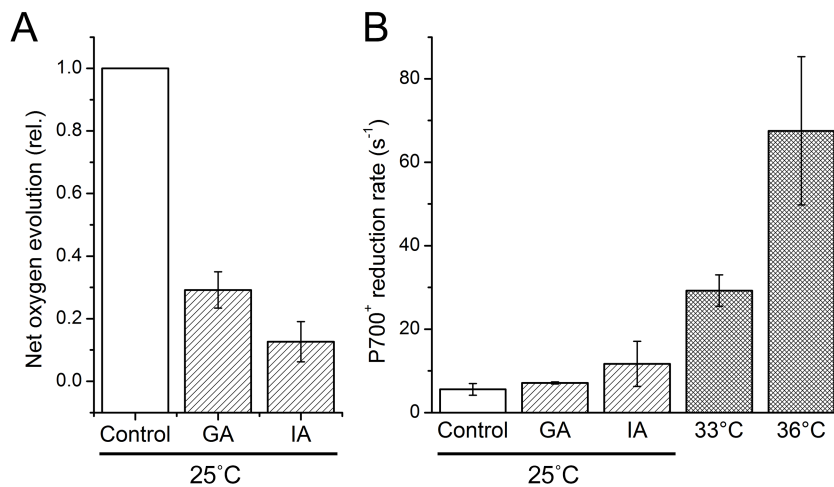

**Supplemental Figure. 5. Effects of glycolaldehyde and iodoacetamide on the reduction of P700<sup>+</sup> in the presence of DCMU in *Symbiodinium* OTcH-1.** The cells were incubated at 25°C for 30 min in the dark in the presence or absence of glycolaldehyde (GA; 120 mM) or iodoacetoamide (IA; 5 mM) and used for the experiments. A, Relative photosynthetic oxygen production rates under light exposure at 2,000  $\mu\text{mol photons m}^{-2} \text{s}^{-1}$ . The photosynthetic oxygen production rate in the absence of inhibitor (control) was  $109 \pm 13 \mu\text{mol O}_2 \text{ mg Chl}^{-1} \text{ hr}^{-1}$ . B, The rate constants for P700<sup>+</sup> reduction in the presence of DCMU. The rates at 33 and 36°C are from Fig. 1B. The values are presented as the means  $\pm$  the SDs of three independent experiments.

## Supplemental Fig. 6

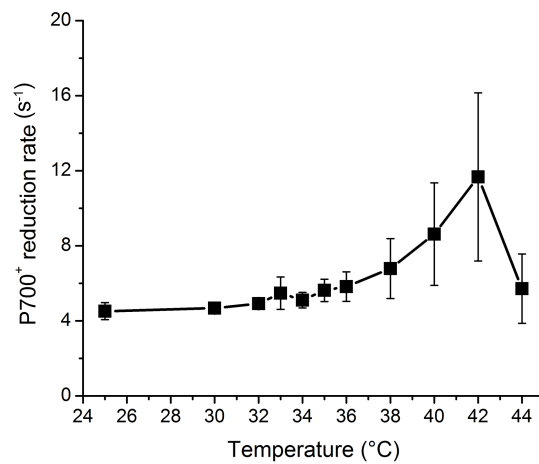

**Supplemental Figure. 6. Effects of elevated temperatures on the P700<sup>+</sup> reduction rates in *Chlamydomonas reinhardtii*.** The cells were incubated at temperatures ranging from 25 to 36°C for 15 min in the dark before the measurements. The rate constants for P700<sup>+</sup> reduction were assessed as in Fig. 1 in the presence of DCMU. The values are presented as the means  $\pm$  the SDs from three independent experiments.

# Supplemental Table 1

| Description | <i>C. reinhardtii</i> | <i>Symbiodinium. sp</i> (Mf1.05b) | e-value |
|-------------|-----------------------|-----------------------------------|---------|
| PGR5        | EDP07159              | symbB1.v1.2.021026.t1             | 1.E-08  |
| PGRL1       | AEE84678              | symbB1.v1.2.019752.t1             | 2.E-13  |
| NDH2        | EDO96450.1            | symbB1.v1.2.028732.t1             | 3.E-25  |
| PTOX        | EDP04078.1            | symbB1.v1.2.019638.t1             | 3.E-62  |

**Supplemental Table. 1. Possible CEF components in *Symbiodinium*.** The amino acid sequences of the proteins possibly involved in CEF or chlororespiration in *C. reinhardtii* were used as queries to search for counterparts in the genome of *Symbiodinium* Mf1.05b (Shoguchi et al., 2013). The accession numbers and e-values for the BlastP searches are shown.
